# Supplementary material for: Transcriptomic Analysis of Host Immune and Cell Death Responses Associated with the Influenza A Virus PB1-F2 Protein
Source: PLOS journal article supplement (doi:10.1371/journal.ppat.1002202), 2011-08-25
Supplement: S2 (10.1371/journal.ppat.1002202.s002) [file journal.ppat.1002202.s002]

Figure S2. Le Goffic *et al.*

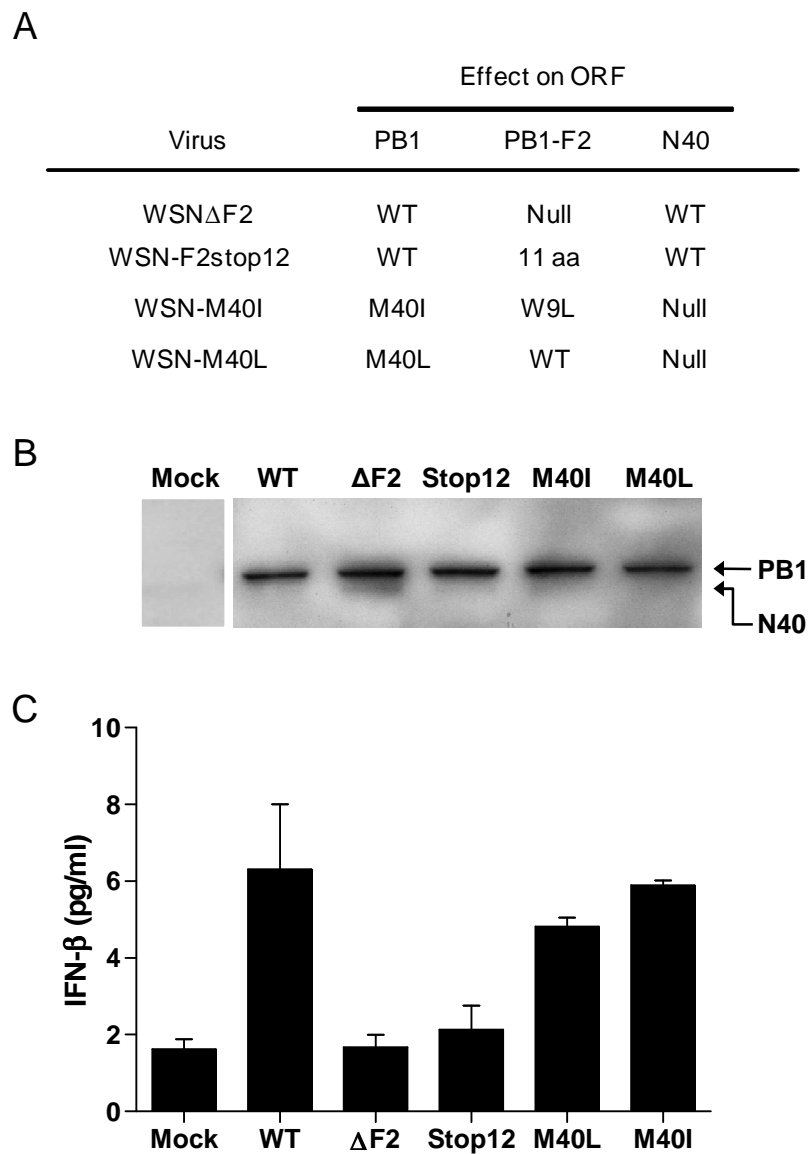

Supplemental Figure S2:

(A) Table depicting ORF phenotypic summary of segment 2 WSN mutants (adapted from Wise *et al.* J Virol. 2009.). We used the 12 plasmids reverse genetics system to generate recombinant viruses containing mutations on the segment 2.  $\Delta$ F2 : the initiation and the three in-frame ATG codons of the ORF were mutated to ACG, Stop12 : a stop codon were introduced in position 12 of ORF encoding PB1-F2. M40I and M40L mutations destroy the N40 AUG. M40I alters the PB1-F2 sequence (W9L) and M40L is silent in the F2 ORF.(B) Lysates from MLE-15 cells mock-infected and infected during 24h with the different mutant viruses (MOI=1) were analyzed by Western blotting using an anti-PB1 antibody. The antibody ( $\nu$ C-19 purchased from Santa Cruz Biotechnology) is directed against the C-terminal part of PB1 and is able to recognize PB1 and N40. (C) Supernatants of infected MLE-15 cells were assayed for IFN- $\beta$  secretion by ELISA.
