# Supplementary material for: Transcriptomic Analysis of Host Immune and Cell Death Responses Associated with the Influenza A Virus PB1-F2 Protein
Source: PLOS journal article supplement (doi:10.1371/journal.ppat.1002202), 2011-08-25

Figure S3. Le Goffic *et al.*

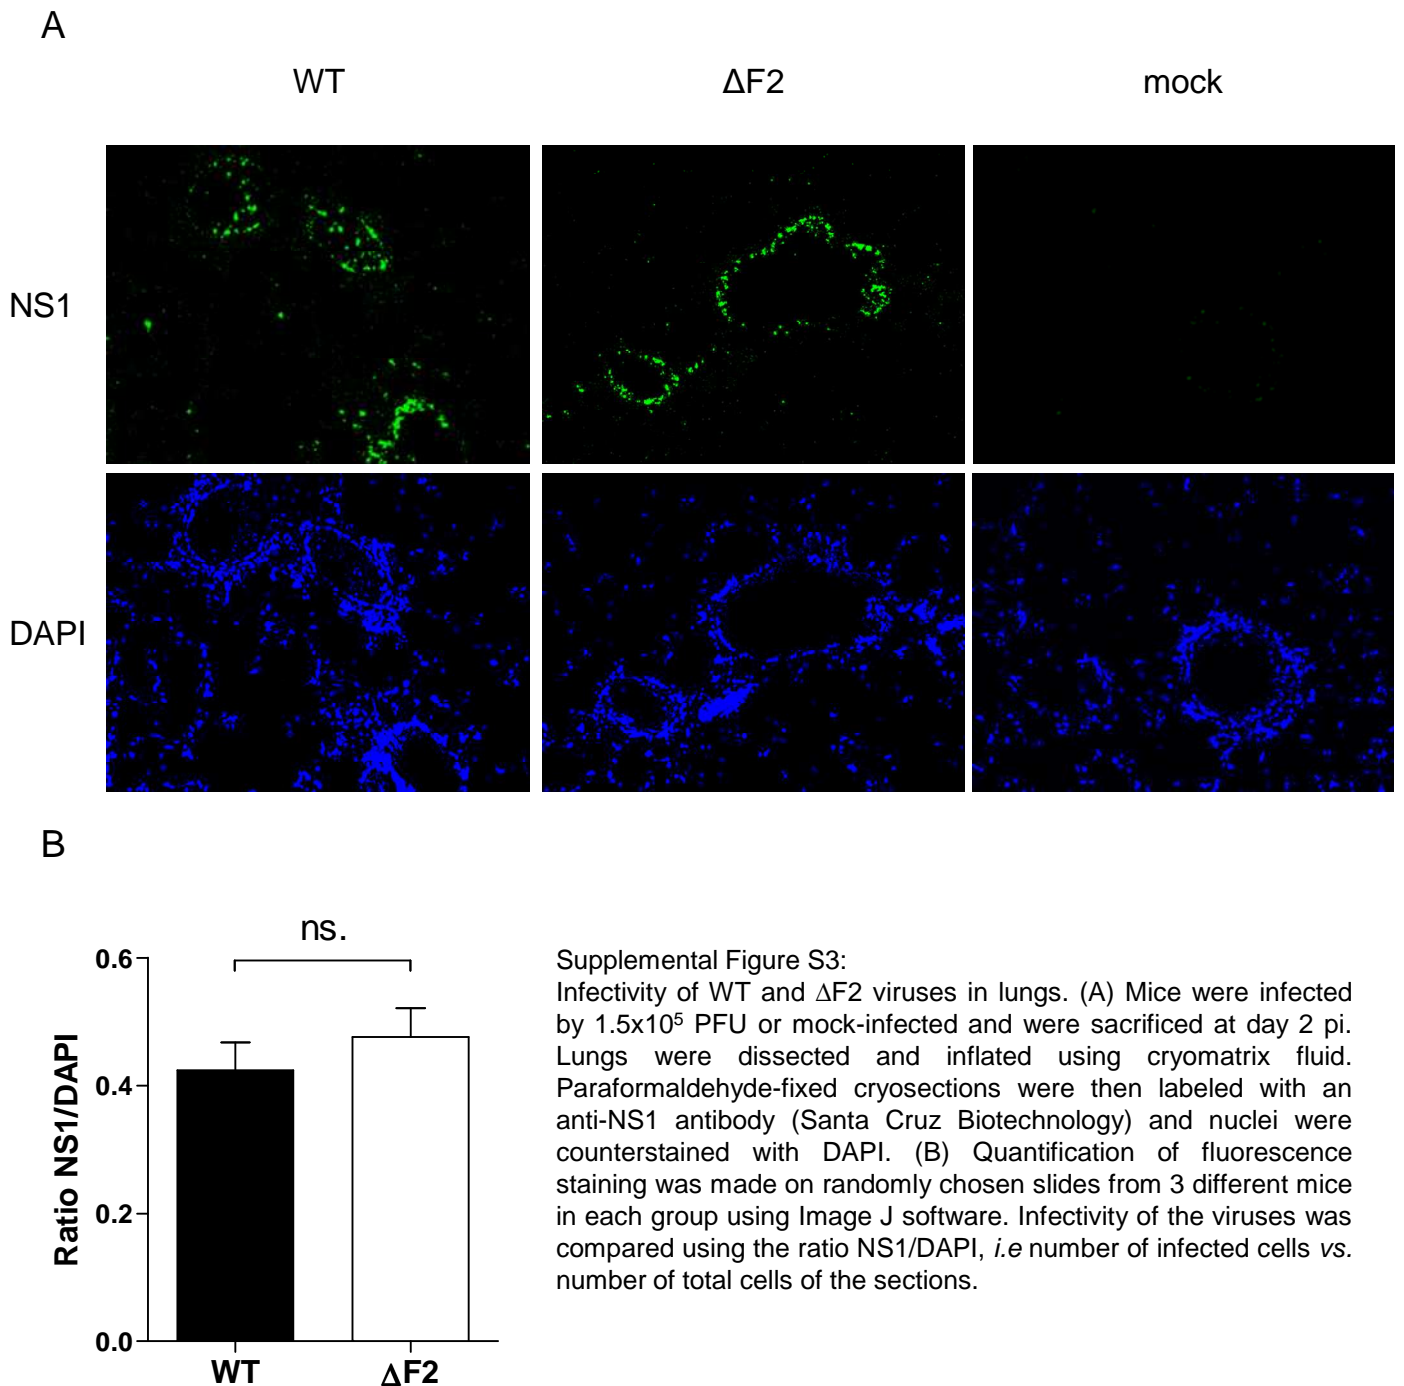

Supplement: S3 (10.1371/journal.ppat.1002202.s003) [file journal.ppat.1002202.s003]
